# Supplementary material for: Induction Chemotherapy Plus Concurrent Chemoradiotherapy Versus Concurrent Chemoradiotherapy Alone in Locoregionally Advanced Nasopharyngeal Carcinoma in Children and Adolescents: A Matched Cohort Analysis
Source: PubMed Central journal article supplement — Cancer Res Treat. 2018 Jan 8;50(4):1304–15. doi: 10.4143/crt.2017.463 (PMC6192939; doi:10.4143/crt.2017.463), 2018-01-08
Supplement: crt-2017-463-suppl1.pdf [file crt-2017-463-suppl1.pdf]

**S1 Table.** Concurrent chemotherapy details

|                          | IC+CCRT (n=43) | CCRT (n=43) |
|--------------------------|----------------|-------------|
| <b>Triweekly regimen</b> | 38             | 33          |
| < 2 cycles               | 1 (2.3)        | 2 (4.7)     |
| ≥ 2 cycles               | 37 (86.0)      | 31 (72.1)   |
| <b>Weekly regimen</b>    | 5              | 9           |
| < 5 cycles               | 2 (4.7)        | 1 (2.3)     |
| ≥ 5 cycles               | 3 (7.0)        | 8 (18.6)    |

Values are presented as number (%). IC, induction chemotherapy; CCRT, concurrent chemoradiotherapy.
